# Supplementary material
Source: bioRxiv or medRxiv preprint supplement (https://medrxiv.org/highwire/filestream/70852/field_highwire_adjunct_files/2/2019.12.23.19014407-3.pdf)

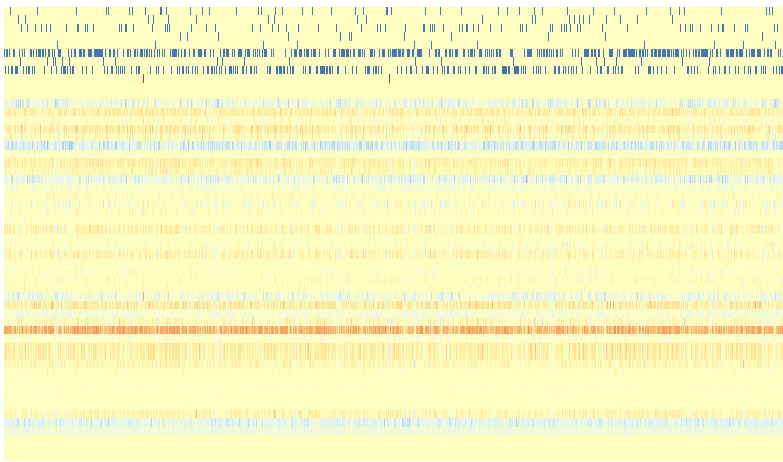

ALSFRS\_TotalR\_DM\_int  
UMN\_adj\_int  
LMN\_adj\_int  
ECAS\_Lang\_int  
ECAS\_Verb\_int  
ECAS\_Exec\_int  
ECAS\_Memo\_int  
ECAS\_Visu\_int  
ECAS\_ALSSp\_int  
ECAS\_ALSNonSp\_int  
ECAS\_TotalInt  
rs11185393  
rs2068667  
rs515342  
rs9820623  
rs13079368  
rs1768208  
rs757651  
rs3828599  
rs17111695  
rs538622  
rs10488631  
rs7813314  
rs10511816  
rs3849942  
rs13302855  
rs10869188  
rs870901  
rs732389  
rs7118388  
rs12803540  
rs17446243  
rs1578303  
rs10492593  
rs12886280  
rs6803044  
rs739439  
rs2285642  
rs7224296  
rs2240601  
rs4239633  
rs12608932  
rs10463311  
rs17070492  
rs117027576  
rs113247976  
rs142321490  
rs74654358  
rs10139154  
rs10143310  
rs9901522  
rs75087725  
PC1  
PC2

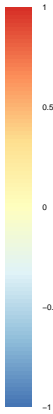

Supplement: Supplementary file [file 2019.12.23.19014407-3.pdf]
